# Supplementary material for: Radical ring-opening polymerization of five-membered cyclic ketene acetals with the tetraleucine macromonomer toward preparation of self-assembling peptide-grafted polyesters
Source: Royal Society of Chemistry journal article supplement (doi:10.1039/d4nj04328f), 2024-01-01
Supplement: d4nj04328f1.pdf [file d4nj04328f1.pdf]

## Supplementary Information

# Radical Ring-Opening Polymerization of Five-Membered Cyclic Ketene Acetals with Tetraleucine Macromonomer Toward Preparation of Self-Assembling Peptide-Grafted Polyester

*Shin-nosuke Nishimura,<sup>1\*</sup> Miki Launois Hasegawa,<sup>1</sup> Katsuya Ueda<sup>1</sup>, and Tomoyuki Koga<sup>1\*</sup>*

<sup>1</sup> Department of Molecular Chemistry and Biochemistry, Faculty of Science and Engineering, Doshisha University, 1-3 Tatara Miyakodani, Kyotanabe, Kyoto 610-0394, JAPAN, Tel:+81-774-65-6622; +81-774-65-6621

e-mail: shnishim@mail.doshisha.ac.jp, tkoga@mail.doshisha.ac.jp

## Contents

|                                                                                                      |    |
|------------------------------------------------------------------------------------------------------|----|
| Figure S1. $^1\text{H}$ NMR spectrum of 2-bromomethyl-1,3-dioxolane.....                             | 3  |
| Figure S2. $^1\text{H}$ NMR spectrum of 2-methylene-1,3-dioxolane ( <b>C5</b> ) .....                | 4  |
| Figure S3. $^{13}\text{C}$ NMR spectrum of the polymer obtained by polymerization of <b>C5</b> ..... | 5  |
| Figure S4. H-H COSY spectrum of the polymer obtained by polymerization of <b>C5</b> .....            | 6  |
| Figure S5. HMQC spectrum of the polymer obtained by polymerization of <b>C5</b> .....                | 7  |
| Figure S6. HMBC spectrum of the polymer obtained by polymerization of <b>C5</b> .....                | 8  |
| Scheme S1. Mechanism of back-biting (1,5-H-transfer) reaction.....                                   | 9  |
| The 3D structures and cartesian coordinates for the transition states .....                          | 10 |

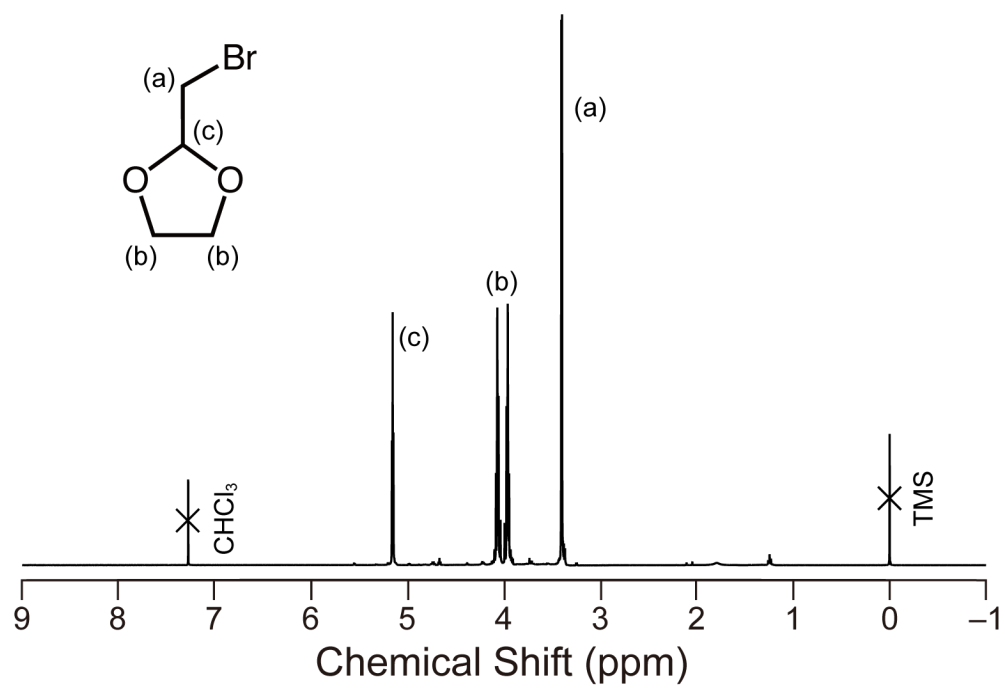

**Figure S1.**  $^1\text{H}$  NMR spectrum of 2-bromomethyl-1,3-dioxolane in  $\text{CDCl}_3$  at 25 °C.

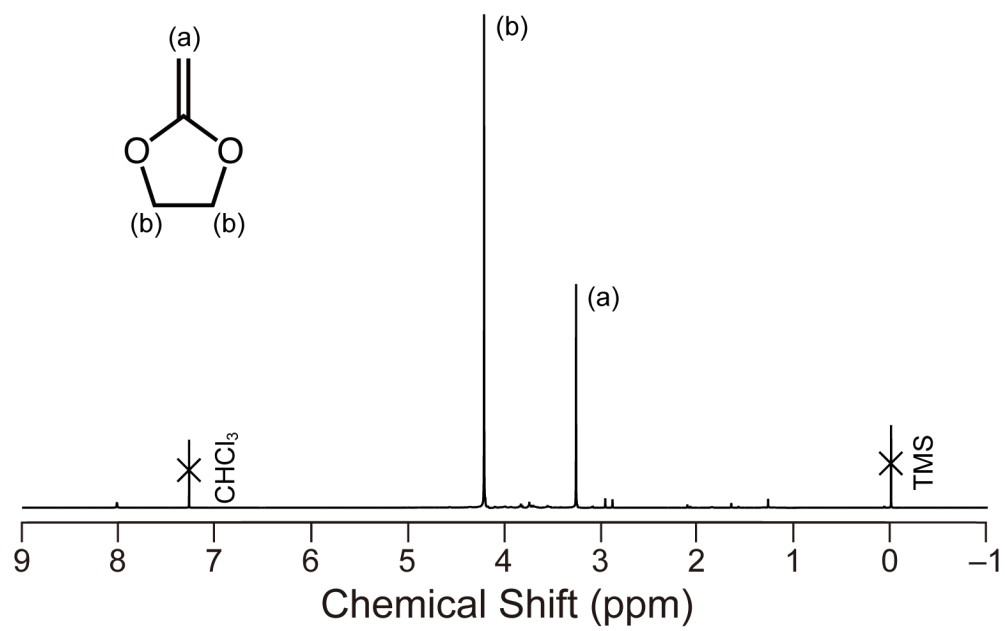

**Figure S2.** <sup>1</sup>H NMR spectrum of 2-methylene-1,3-dioxolane (C5) in CDCl<sub>3</sub> at 25 °C.

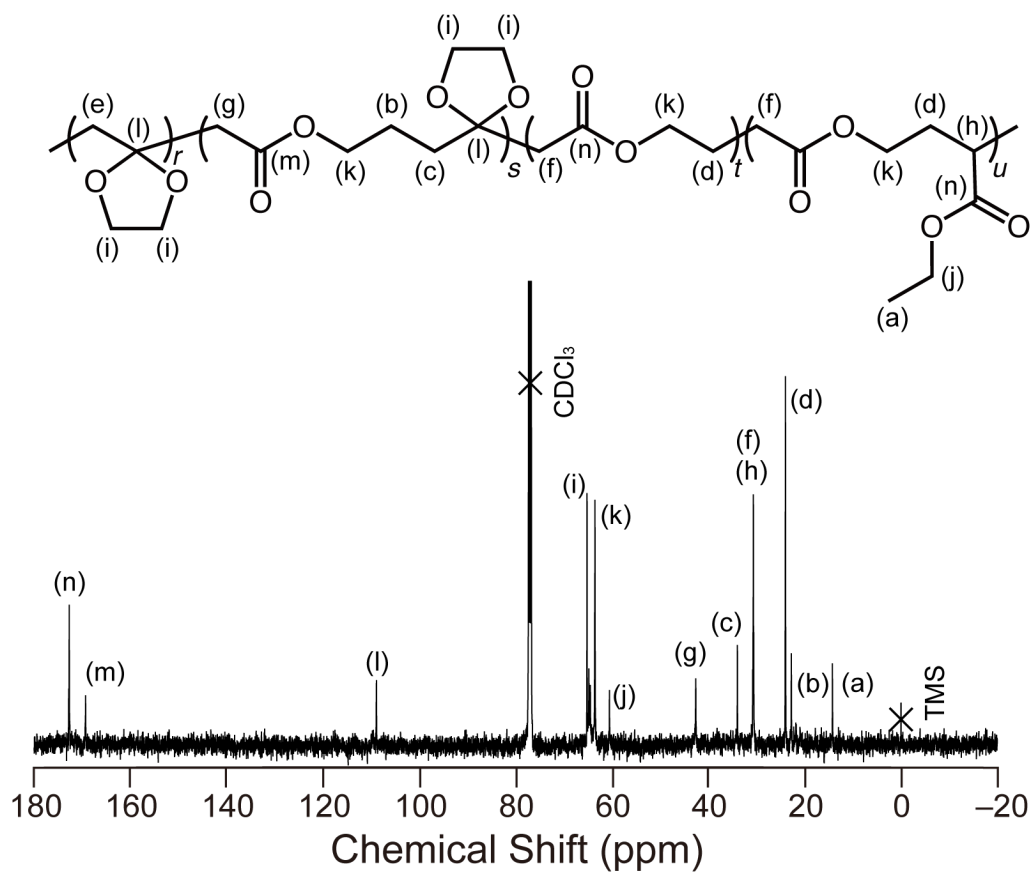

**Figure S3.**  $^{13}\text{C}$  NMR spectrum of the polymer obtained by polymerization of **C5** at 120 °C. The spectrum was measured in  $\text{CDCl}_3$  at 25 °C.

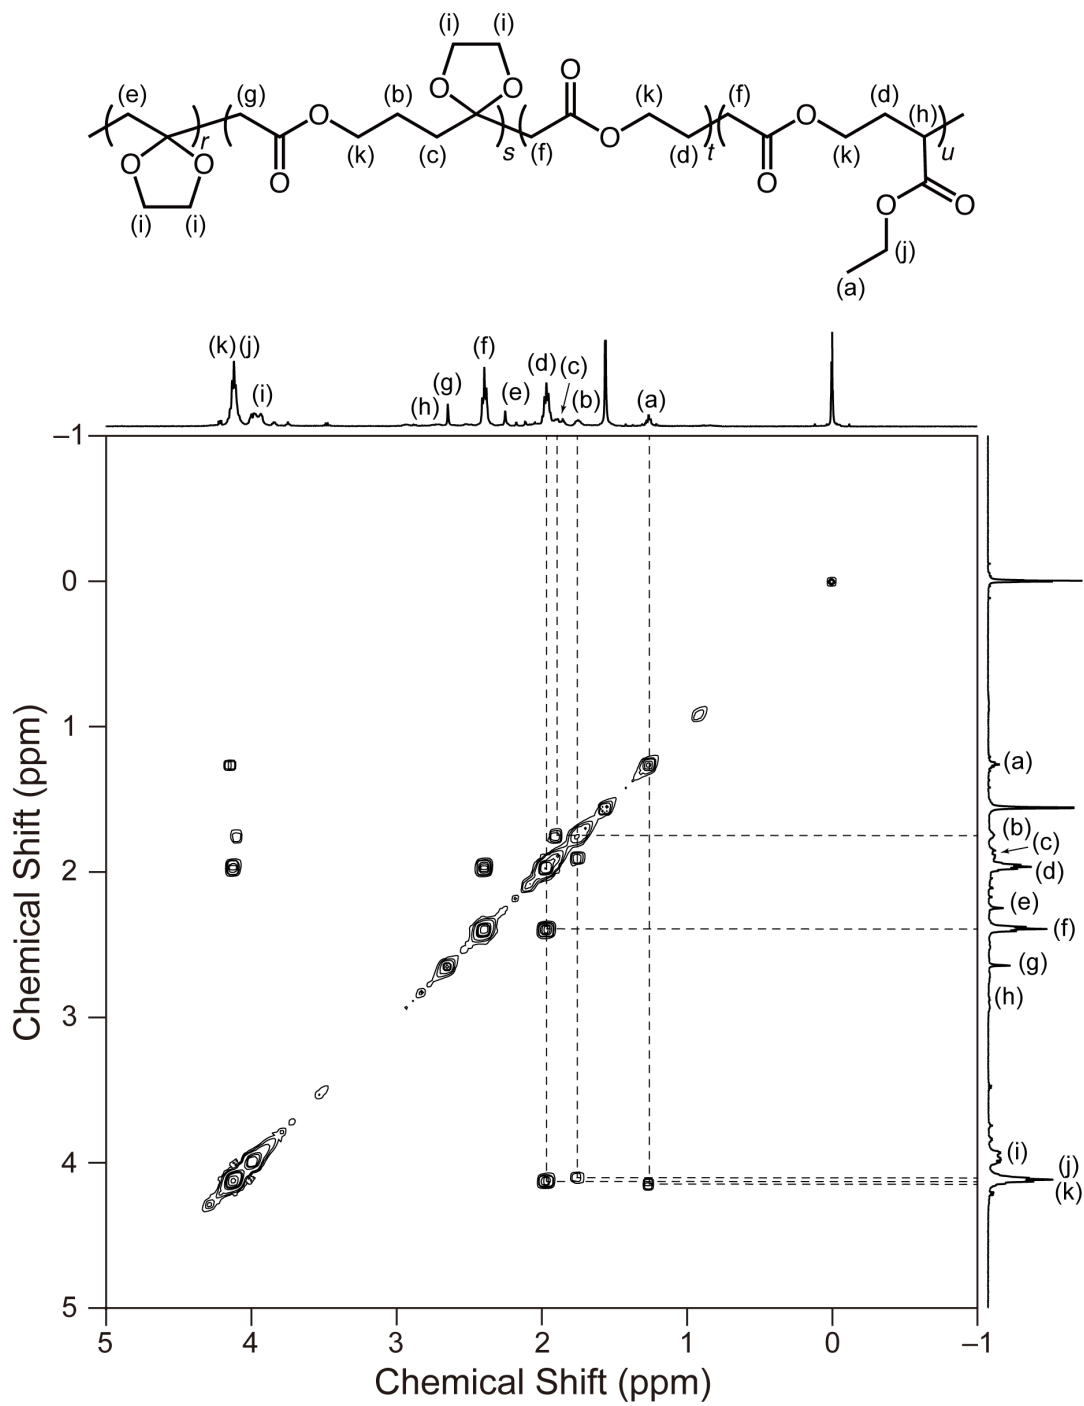

**Figure S4.** H-H COSY spectrum of the polymer obtained by polymerization of **C5** at 120 °C. The spectrum was measured in CDCl<sub>3</sub> at 25 °C.

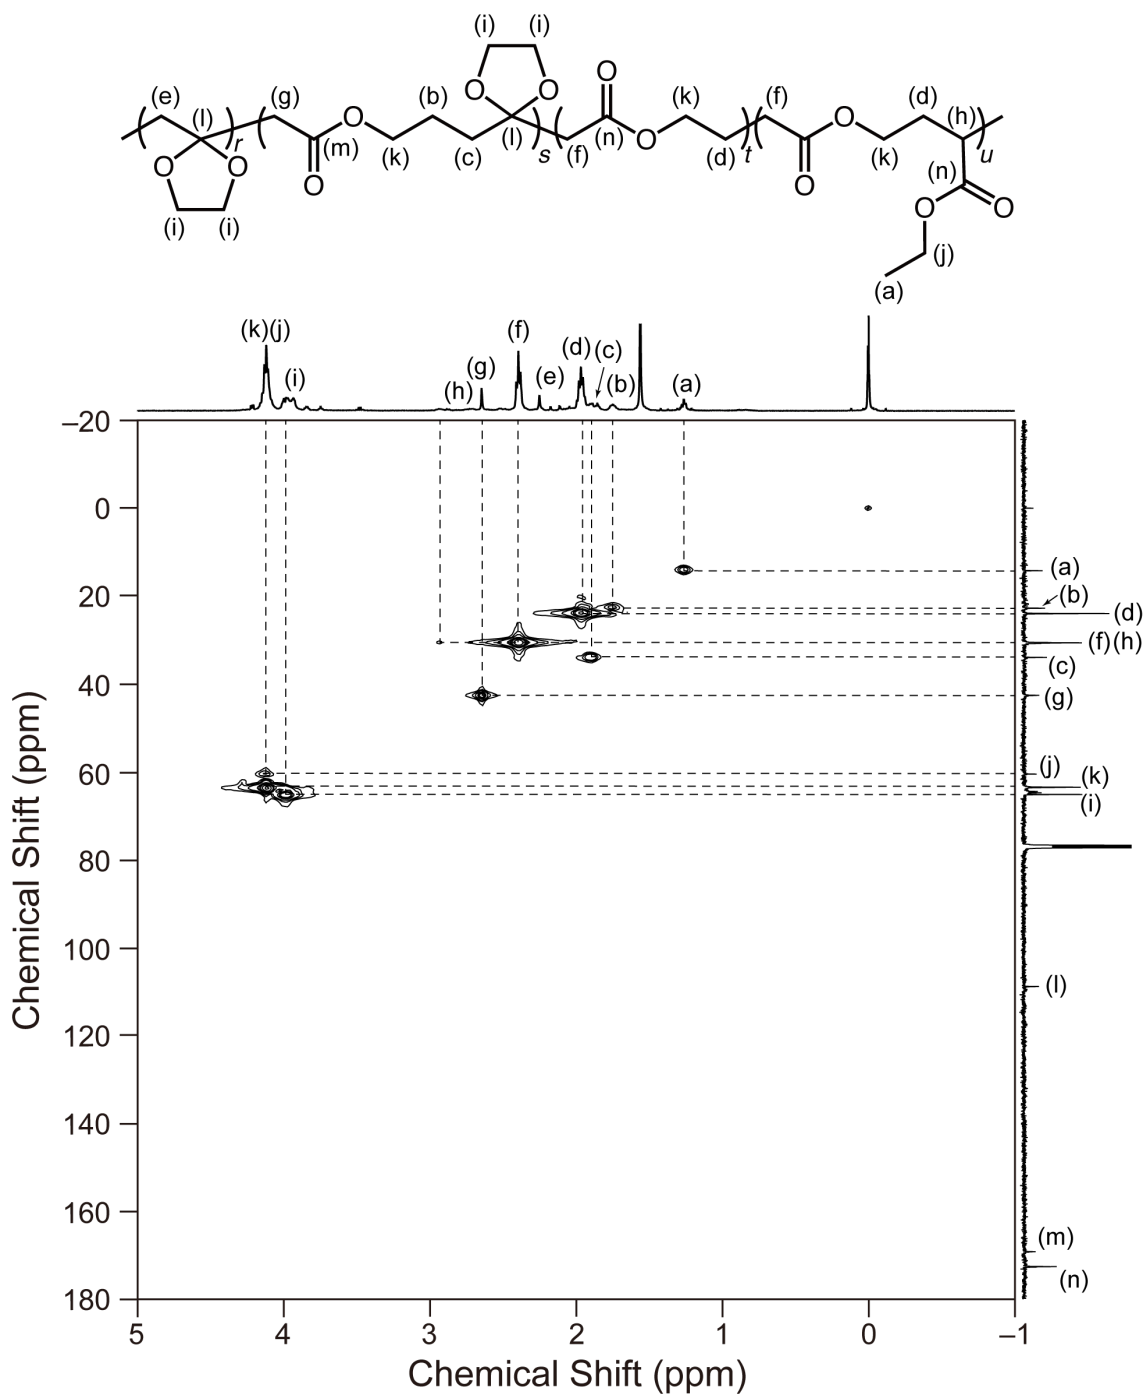

**Figure S5.** HMBC spectrum of the polymer obtained by polymerization of **C5** at 120 °C. The spectrum was measured in  $\text{CDCl}_3$  at 25 °C.

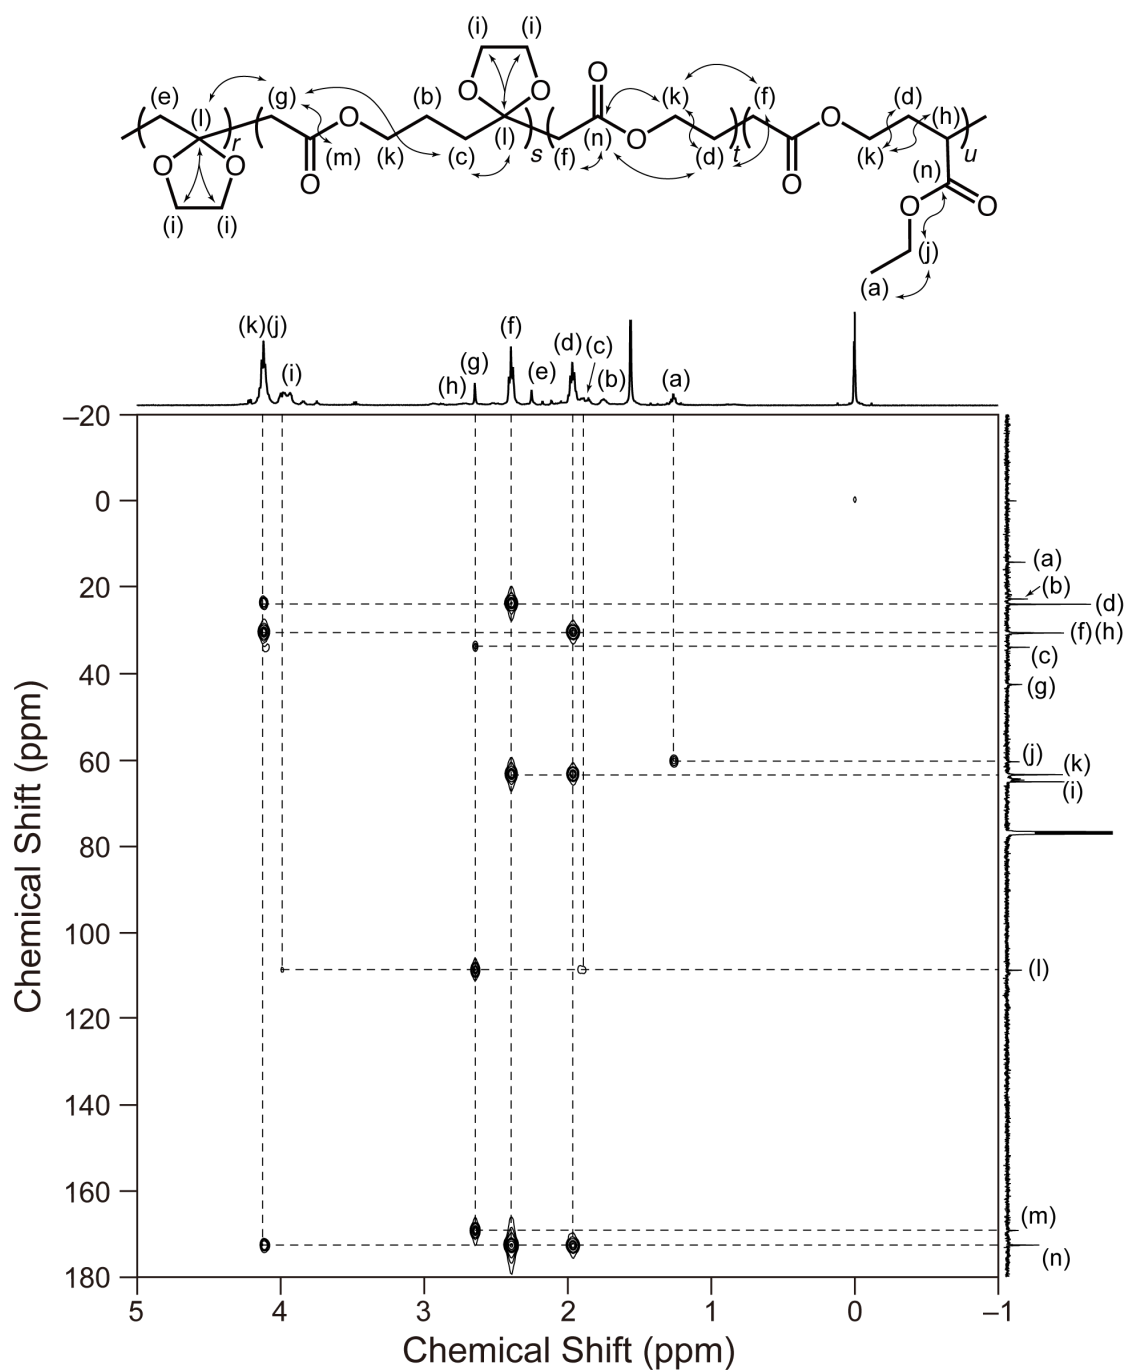

**Figure S6.** HMBC spectrum of the polymer obtained by polymerization of **C5** at 120 °C. The spectrum was measured in  $\text{CDCl}_3$  at 25 °C.



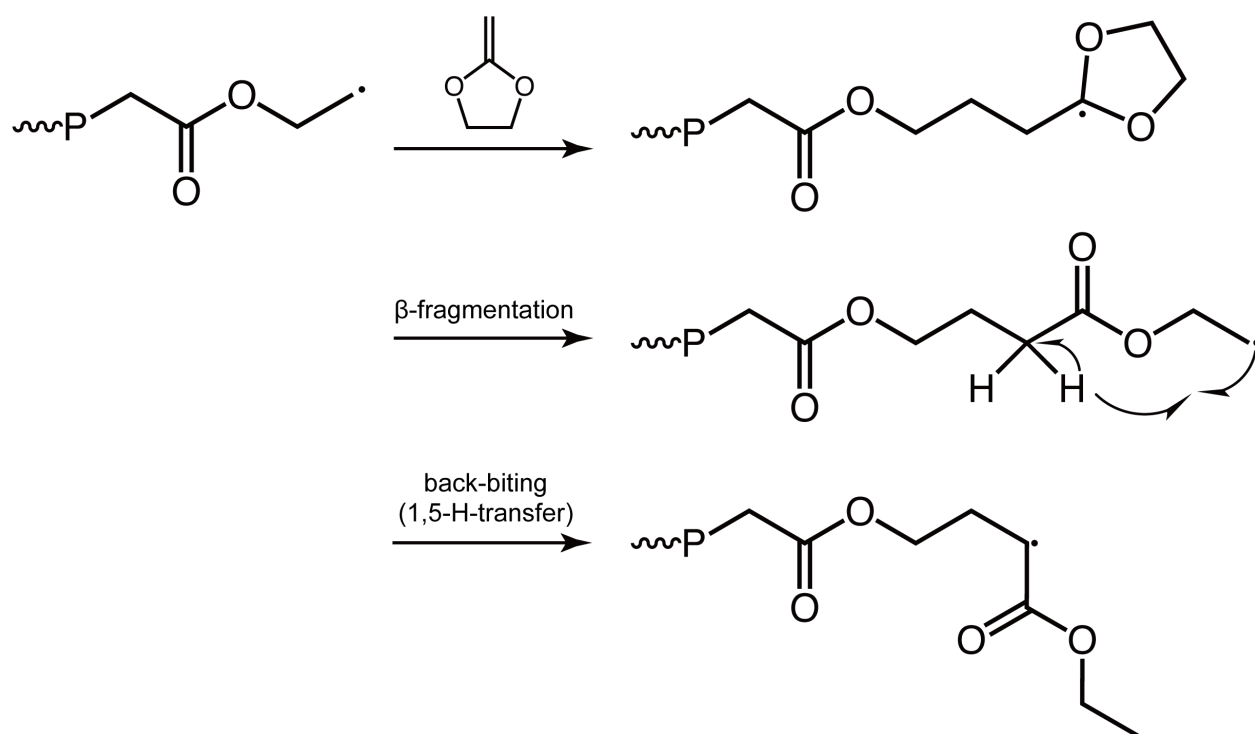

**Scheme S1.** Mechanism of back-biting (1,5-H-transfer) reaction that occurred during the propagation reaction of C5 polymerization.

## The 3D Structures and Cartesian Coordinates for The Transition States in The Reactions

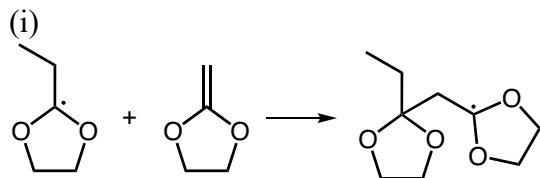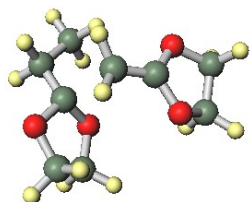

|   | x         | y         | z         |
|---|-----------|-----------|-----------|
| C | -0.0554   | 2.295652  | -0.932439 |
| C | -0.316337 | 1.37979   | 0.268216  |
| C | 0.763052  | 0.352759  | 0.480132  |
| C | 2.691086  | 1.394078  | 1.101902  |
| C | 3.569172  | 1.386735  | 0.059745  |
| O | 3.586895  | 2.343754  | -0.927982 |
| C | 4.528963  | 1.923346  | -1.919703 |
| C | 4.585486  | 0.412579  | -1.696215 |
| O | 4.352995  | 0.311642  | -0.284585 |
| O | 0.48032   | -0.533964 | 1.515707  |
| C | 1.239351  | -1.710565 | 1.248652  |
| C | 1.257897  | -1.759009 | -0.284007 |
| O | 1.094978  | -0.389187 | -0.661579 |
| H | -0.847569 | 3.047189  | -1.020037 |
| H | 0.904463  | 2.813235  | -0.842954 |
| H | -0.032406 | 1.71523   | -1.860141 |
| H | -0.404719 | 1.967289  | 1.190308  |
| H | -1.28023  | 0.858957  | 0.136173  |
| H | 2.256577  | 2.345582  | 1.386162  |
| H | 2.844336  | 0.675041  | 1.897425  |
| H | 4.154195  | 2.215821  | -2.903273 |

|   |          |           |           |
|---|----------|-----------|-----------|
| H | 5.500774 | 2.401347  | -1.737563 |
| H | 3.784676 | -0.104876 | -2.239787 |
| H | 5.551863 | -0.041863 | -1.92395  |
| H | 2.254734 | -1.614878 | 1.656119  |
| H | 0.736696 | -2.559723 | 1.717612  |
| H | 2.200569 | -2.140732 | -0.688085 |
| H | 0.425594 | -2.349163 | -0.689554 |

(ii)

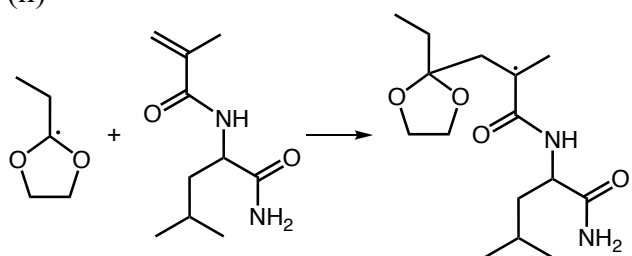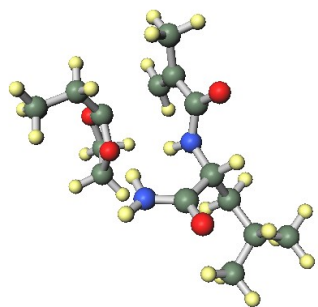

|   | x        | y         | z         |
|---|----------|-----------|-----------|
| C | 1.249716 | 3.442901  | -1.313382 |
| C | 1.872197 | 2.092018  | -1.546832 |
| C | 1.136496 | 0.939     | -1.58041  |
| C | 1.139745 | -0.15982  | 0.514874  |
| O | 2.417605 | -0.735908 | 0.598609  |
| C | 2.270424 | -2.169756 | 0.595558  |
| C | 0.873799 | -2.353097 | 0.003439  |
| O | 0.20059  | -1.16602  | 0.43747   |
| C | 0.839145 | 0.915106  | 1.519775  |
| C | 0.849635 | 0.419319  | 2.976826  |
| C | 3.353241 | 2.108979  | -1.735986 |
| N | 4.009408 | 0.91215   | -1.542399 |
| C | 5.450015 | 0.771153  | -1.693446 |
| C | 5.761185 | -0.452895 | -2.591865 |
| C | 7.250659 | -0.701276 | -2.947674 |
| C | 7.376443 | -1.169234 | -4.40663  |
| C | 7.9182   | -1.714597 | -2.004255 |
| C | 6.210357 | 0.731153  | -0.353974 |

|   |           |           |           |
|---|-----------|-----------|-----------|
| N | 5.505122  | 0.300854  | 0.736465  |
| O | 7.402269  | 1.00581   | -0.297346 |
| O | 3.950416  | 3.14225   | -2.038097 |
| H | 1.497435  | 4.119874  | -2.138396 |
| H | 0.161185  | 3.369251  | -1.227966 |
| H | 1.640152  | 3.920286  | -0.405134 |
| H | 0.051079  | 0.9846    | -1.560869 |
| H | 1.551924  | 0.021471  | -1.986889 |
| H | 3.073394  | -2.60632  | -0.0025   |
| H | 2.334626  | -2.542193 | 1.62488   |
| H | 0.893628  | -2.396188 | -1.093047 |
| H | 0.331651  | -3.216186 | 0.394107  |
| H | 1.57362   | 1.715774  | 1.381747  |
| H | -0.139921 | 1.338077  | 1.269146  |
| H | 0.627684  | 1.242571  | 3.664113  |
| H | 0.099192  | -0.363054 | 3.129284  |
| H | 1.830898  | 0.012472  | 3.244631  |
| H | 3.483225  | 0.129979  | -1.177201 |
| H | 5.793212  | 1.680319  | -2.192065 |
| H | 5.339444  | -1.356487 | -2.124546 |
| H | 5.184827  | -0.288752 | -3.510585 |
| H | 7.78666   | 0.250107  | -2.844537 |
| H | 8.424744  | -1.347098 | -4.674615 |
| H | 6.830121  | -2.108351 | -4.568725 |
| H | 6.973165  | -0.424667 | -5.103359 |
| H | 8.972012  | -1.856357 | -2.27273  |
| H | 7.886321  | -1.380419 | -0.964379 |
| H | 7.424603  | -2.694104 | -2.073399 |
| H | 5.980634  | 0.363331  | 1.626639  |
| H | 4.494289  | 0.280886  | 0.743732  |

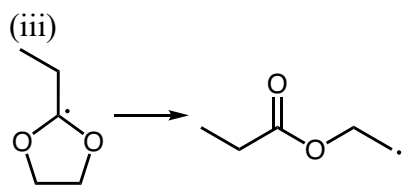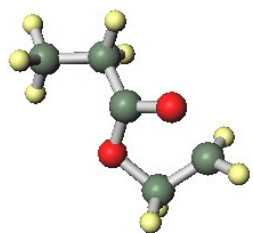

|   | x         | y         | z         |
|---|-----------|-----------|-----------|
| C | 3.581202  | -0.922577 | -0.566127 |
| C | 2.326317  | -0.160008 | -0.12432  |
| C | 1.041309  | -0.795902 | -0.59197  |
| O | 0.889575  | -2.11389  | -0.29544  |
| C | -0.523392 | -2.371323 | 0.032484  |
| C | -1.170166 | -1.063009 | 0.35022   |
| O | -0.057206 | -0.150592 | -0.742839 |
| H | 4.483604  | -0.433512 | -0.184653 |
| H | 3.563544  | -1.95033  | -0.191139 |
| H | 3.6513    | -0.964255 | -1.658565 |
| H | 2.304716  | -0.096321 | 0.978795  |
| H | 2.339754  | 0.867937  | -0.500012 |
| H | -0.986769 | -2.855308 | -0.832927 |
| H | -0.49505  | -3.069818 | 0.872099  |
| H | -2.137041 | -0.839953 | -0.085347 |
| H | -1.009928 | -0.649245 | 1.342922  |

(iv)

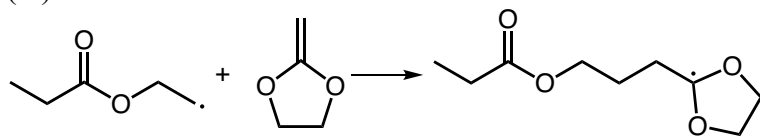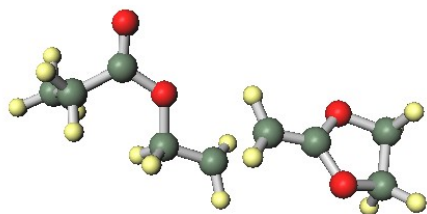

|   | x         | y         | z         |
|---|-----------|-----------|-----------|
| O | 1.905661  | 5.683475  | -2.147622 |
| C | 1.843254  | 5.461999  | -0.960011 |
| O | 1.374152  | 4.255736  | -0.549226 |
| C | 1.285941  | 3.890673  | 0.849742  |
| C | 0.601742  | 2.570843  | 0.943619  |
| C | 1.849814  | 1.117867  | -0.399373 |
| C | 1.244915  | -0.09305  | -0.471874 |
| O | 0.206545  | -0.382613 | -1.312388 |
| C | -0.073638 | -1.782116 | -1.183653 |
| C | 0.433601  | -2.085647 | 0.225896  |
| O | 1.498078  | -1.136521 | 0.377182  |
| C | 2.223719  | 6.516063  | 0.073681  |
| C | 1.049183  | 7.479048  | 0.330572  |
| H | 2.295166  | 3.840815  | 1.282067  |
| H | 0.73587   | 4.682949  | 1.386036  |
| H | 0.685177  | 2.057828  | 1.898085  |
| H | -0.361335 | 2.484307  | 0.447724  |
| H | 1.73944   | 1.808557  | -1.223537 |
| H | 2.721606  | 1.209152  | 0.23576   |
| H | -1.146466 | -1.934136 | -1.317585 |
| H | 0.478016  | -2.342745 | -1.949361 |
| H | -0.335199 | -1.903839 | 0.988067  |

|   |          |           |           |
|---|----------|-----------|-----------|
| H | 0.843688 | -3.090072 | 0.34923   |
| H | 2.568241 | 6.075831  | 1.013782  |
| H | 3.059067 | 7.072611  | -0.360424 |
| H | 1.353779 | 8.281122  | 1.0107    |
| H | 0.718597 | 7.929939  | -0.610095 |
| H | 0.192452 | 6.963116  | 0.77856   |



(v)

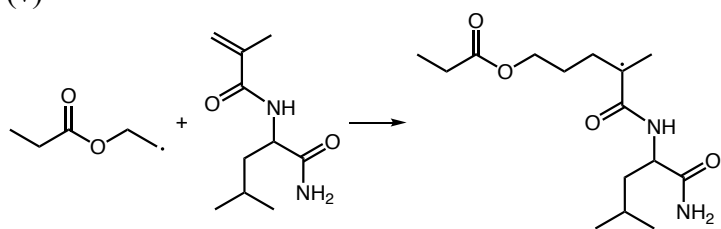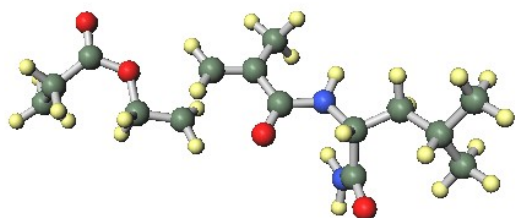

|   | x         | y        | z         |
|---|-----------|----------|-----------|
| O | 5.247564  | 1.709123 | -1.283173 |
| C | 4.525537  | 0.814371 | -0.912492 |
| O | 3.274771  | 1.136466 | -0.476106 |
| C | 2.327756  | 0.140318 | -0.037074 |
| C | 1.140577  | 0.847675 | 0.511167  |
| C | 0.295572  | 2.100244 | -1.41146  |
| C | -0.699777 | 2.912846 | -0.973577 |
| C | -0.451937 | 4.344413 | -0.565823 |
| C | -2.061082 | 2.305995 | -0.853057 |
| N | -3.088715 | 3.163978 | -0.510519 |
| C | -4.481317 | 2.716364 | -0.58813  |
| C | -5.391057 | 3.961942 | -0.683234 |
| C | -6.910179 | 3.691895 | -0.838533 |
| C | -7.538138 | 4.730466 | -1.781868 |
| C | -7.64558  | 3.685113 | 0.51122   |
| C | -4.871764 | 1.787617 | 0.576133  |
| N | -4.210164 | 2.003899 | 1.753057  |
| O | -5.781542 | 0.980237 | 0.456683  |
| O | -2.274132 | 1.104056 | -1.008721 |
| C | 4.987244  | -0.6362  | -0.867635 |

|   |           |           |           |
|---|-----------|-----------|-----------|
| C | 5.768025  | -0.923333 | 0.42927   |
| H | 2.04458   | -0.508976 | -0.876364 |
| H | 2.797959  | -0.497947 | 0.7302    |
| H | 0.214624  | 0.29366   | 0.620005  |
| H | 1.314044  | 1.675672  | 1.191086  |
| H | 1.300228  | 2.472676  | -1.580073 |
| H | 0.043876  | 1.11959   | -1.798868 |
| H | -0.783855 | 4.54677   | 0.461766  |
| H | 0.61365   | 4.58323   | -0.624279 |
| H | -0.976255 | 5.057192  | -1.219713 |
| H | -2.926809 | 4.159099  | -0.589584 |
| H | -4.610554 | 2.100865  | -1.484649 |
| H | -5.216466 | 4.601089  | 0.19454   |
| H | -5.037241 | 4.527921  | -1.556586 |
| H | -7.032341 | 2.699217  | -1.289737 |
| H | -8.61349  | 4.554039  | -1.900488 |
| H | -7.411765 | 5.74828   | -1.388742 |
| H | -7.080878 | 4.698114  | -2.77838  |
| H | -8.712779 | 3.481005  | 0.364928  |
| H | -7.253772 | 2.918715  | 1.183973  |
| H | -7.55932  | 4.662064  | 1.006083  |
| H | -4.356631 | 1.319753  | 2.483106  |
| H | -3.319703 | 2.480043  | 1.728049  |
| H | 4.159696  | -1.342561 | -0.979389 |
| H | 5.652319  | -0.764986 | -1.726019 |
| H | 6.164561  | -1.943502 | 0.416624  |
| H | 6.606658  | -0.227373 | 0.526908  |
| H | 5.135248  | -0.818159 | 1.317806  |

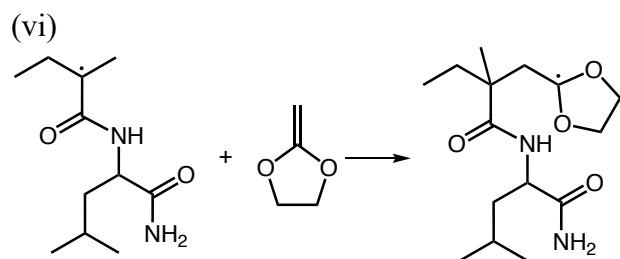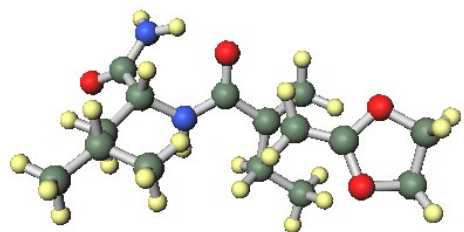

|   | x         | y         | z         |
|---|-----------|-----------|-----------|
| O | 1.061697  | -4.83758  | -0.639262 |
| C | 1.793923  | -3.925119 | -1.075662 |
| N | 3.12004   | -4.170102 | -1.335164 |
| C | 3.749972  | -5.4822   | -1.150783 |
| C | 5.265156  | -5.350606 | -0.933222 |
| C | 5.720559  | -5.167313 | 0.527553  |
| C | 5.187457  | -3.885374 | 1.184228  |
| C | 7.254204  | -5.215455 | 0.606521  |
| C | 3.434147  | -6.402894 | -2.366248 |
| N | 2.136606  | -6.807031 | -2.410236 |
| O | 4.280822  | -6.731195 | -3.188344 |
| C | 1.297607  | -2.537878 | -1.245877 |
| C | 2.220323  | -1.535787 | -1.92677  |
| C | 1.694229  | -0.099337 | -2.043602 |
| C | -0.171535 | -2.461636 | -1.591984 |
| C | 1.311348  | -2.066115 | 0.872292  |
| C | 0.558432  | -0.984281 | 1.265195  |
| O | -0.792941 | -1.027396 | 1.449069  |
| C | -1.197928 | 0.24894   | 1.965041  |
| C | -0.101444 | 1.17554   | 1.439758  |

|   |           |           |           |
|---|-----------|-----------|-----------|
| O | 1.032198  | 0.29547   | 1.361081  |
| H | 3.655332  | -3.484298 | -1.847179 |
| H | 3.273127  | -5.926338 | -0.269611 |
| H | 5.731465  | -6.251199 | -1.343921 |
| H | 5.652774  | -4.524321 | -1.54859  |
| H | 5.329993  | -6.022901 | 1.10037   |
| H | 5.549062  | -3.798932 | 2.216072  |
| H | 5.529144  | -2.994561 | 0.639279  |
| H | 4.093795  | -3.86341  | 1.208878  |
| H | 7.599475  | -5.139684 | 1.644386  |
| H | 7.648023  | -6.148336 | 0.186548  |
| H | 7.701627  | -4.383789 | 0.046466  |
| H | 1.827808  | -7.298497 | -3.238031 |
| H | 1.456304  | -6.366006 | -1.792051 |
| H | 3.18506   | -1.502583 | -1.400982 |
| H | 2.44319   | -1.895838 | -2.947862 |
| H | 2.428309  | 0.527478  | -2.562062 |
| H | 0.761404  | -0.054944 | -2.61511  |
| H | 1.51841   | 0.339328  | -1.05728  |
| H | -0.612569 | -1.504631 | -1.297308 |
| H | -0.326558 | -2.573751 | -2.677371 |
| H | -0.716861 | -3.264937 | -1.093028 |
| H | 0.907039  | -3.040215 | 1.123304  |
| H | 2.38678   | -1.947252 | 0.949764  |
| H | -2.196086 | 0.473829  | 1.585253  |
| H | -1.217247 | 0.211564  | 3.061438  |
| H | -0.330915 | 1.564247  | 0.43997   |
| H | 0.147814  | 2.000947  | 2.109086  |

(vii)

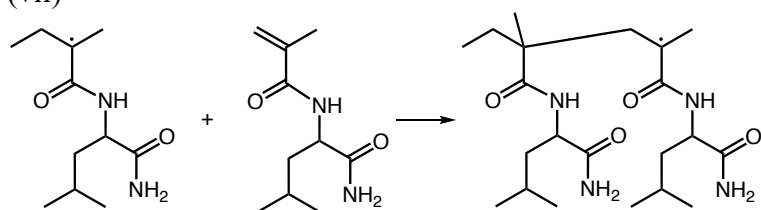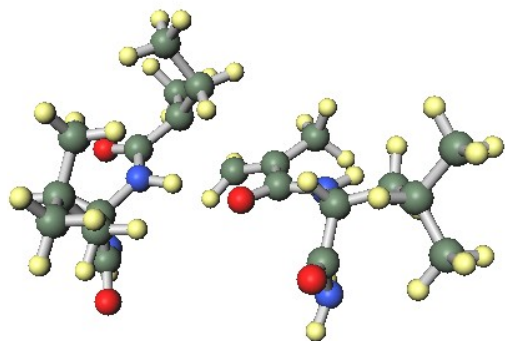

|   | x         | y         | z         |
|---|-----------|-----------|-----------|
| O | 5.254781  | 3.443728  | 1.949904  |
| C | 4.142237  | 3.331262  | 1.403371  |
| N | 3.864048  | 2.353747  | 0.50058   |
| C | 4.838211  | 1.338172  | 0.086241  |
| C | 4.498203  | 0.779092  | -1.304713 |
| C | 5.15315   | 1.507952  | -2.49411  |
| C | 4.740396  | 2.982056  | -2.613546 |
| C | 4.848333  | 0.755471  | -3.798338 |
| C | 4.958359  | 0.191673  | 1.140364  |
| N | 5.246427  | 0.630984  | 2.397549  |
| O | 4.8154    | -0.990913 | 0.862264  |
| C | 3.035977  | 4.289964  | 1.737845  |
| C | 2.221446  | 4.872034  | 0.600622  |
| C | 3.000374  | 5.925323  | -0.214487 |
| C | 3.356486  | 5.222674  | 2.877725  |
| C | 1.628634  | 2.822476  | 2.754281  |
| C | 0.361353  | 2.892989  | 2.215039  |
| C | -0.716162 | 3.760387  | 2.817661  |

|   |           |           |           |
|---|-----------|-----------|-----------|
| C | 0.098082  | 2.129383  | 0.971442  |
| N | -1.214146 | 1.925722  | 0.626493  |
| C | -1.589415 | 1.392658  | -0.68511  |
| C | -3.077606 | 1.727521  | -0.934973 |
| C | -3.652027 | 1.312508  | -2.314644 |
| C | -4.628369 | 2.384597  | -2.824345 |
| C | -4.341297 | -0.060504 | -2.27022  |
| C | -1.280405 | -0.108212 | -0.846058 |
| N | -1.308538 | -0.854423 | 0.29887   |
| O | -1.115178 | -0.588057 | -1.957523 |
| O | 1.002039  | 1.669744  | 0.254676  |
| H | 2.884798  | 2.160343  | 0.281448  |
| H | 5.815639  | 1.837414  | 0.069445  |
| H | 4.808289  | -0.270042 | -1.312397 |
| H | 3.406291  | 0.766409  | -1.431644 |
| H | 6.243161  | 1.477126  | -2.337552 |
| H | 5.219547  | 3.450973  | -3.481763 |
| H | 3.653924  | 3.07465   | -2.742166 |
| H | 5.021277  | 3.55726   | -1.725501 |
| H | 5.349687  | 1.225143  | -4.653082 |
| H | 5.179218  | -0.288249 | -3.744238 |
| H | 3.770301  | 0.751883  | -4.005264 |
| H | 5.440502  | -0.069082 | 3.100159  |
| H | 5.511302  | 1.602092  | 2.550677  |
| H | 1.885168  | 4.080549  | -0.074707 |
| H | 1.319632  | 5.34182   | 1.013826  |
| H | 2.372722  | 6.313234  | -1.024746 |
| H | 3.306556  | 6.772994  | 0.407347  |
| H | 3.899713  | 5.493419  | -0.665361 |
| H | 2.458534  | 5.75368   | 3.213957  |
| H | 3.804392  | 4.690457  | 3.720515  |
| H | 4.092473  | 5.976463  | 2.563944  |

|   |           |           |           |
|---|-----------|-----------|-----------|
| H | 2.276721  | 2.000876  | 2.475443  |
| H | 1.806549  | 3.260388  | 3.731511  |
| H | -1.549086 | 3.163141  | 3.219891  |
| H | -0.319814 | 4.345794  | 3.652048  |
| H | -1.145683 | 4.464011  | 2.09126   |
| H | -1.937096 | 2.37882   | 1.167928  |
| H | -0.975005 | 1.879508  | -1.449649 |
| H | -3.68411  | 1.281122  | -0.13327  |
| H | -3.164103 | 2.81739   | -0.822039 |
| H | -2.816493 | 1.242683  | -3.02205  |
| H | -5.043902 | 2.1048    | -3.799107 |
| H | -5.470217 | 2.51367   | -2.130958 |
| H | -4.135582 | 3.358073  | -2.936793 |
| H | -4.721597 | -0.33081  | -3.262141 |
| H | -3.654157 | -0.849416 | -1.955673 |
| H | -5.19542  | -0.045046 | -1.579675 |
| H | -0.963104 | -1.802084 | 0.21832   |
| H | -1.171766 | -0.391771 | 1.186251  |
